# Supplementary material for: HPV Infection of the Oropharyngeal, Genital and Anal Mucosa and Associated Dysplasia in People Living with HIV
Source: MDPI journal article supplement (doi:10.3390/v15051170), 2023-05-15
Supplement: s1 [file s1]

Supplementary Table S1. Current HPV infection and presence of female genital dysplasia

|                                          | N=62      |
|------------------------------------------|-----------|
| HPV+ PCR, n (%)                          | 31 (50)   |
| Genotype identification, n (%)           | 56 (90.3) |
| HPV-HR, n (%)                            | 14 (25.0) |
| Number of HPV-HR serotypes, median (IQR) | 0 (0-0.5) |
| HPV-LR, n (%)                            | 17 (30.4) |
| Number of HPV-LR serotypes, median (IQR) | 0 (0-1)   |
| LR- and HR-HPV coinfection, n (%)        | 7 (12.5)  |
| HPV 6, n (%)                             | 2 (3.6)   |
| HPV 16, n (%)                            | 4 (7.1)   |
| HPV 31, n (%)                            | 1 (1.8)   |
| HPV 35, n (%)                            | 2 (3.6)   |
| HPV 39, n (%)                            | 1 (1.8)   |
| HPV 40, n (%)                            | 1 (1.8)   |
| HPV 42, n (%)                            | 4 (7.1)   |
| HPV 43, n (%)                            | 2 (3.6)   |
| HPV 44, n (%)                            | 4 (7.1)   |
| HPV 44/55, n (%)                         | 3 (5.4)   |
| HPV 51, n (%)                            | 5 (8.9)   |
| HPV 54, n (%)                            | 1 (1.8)   |
| HPV 59, n (%)                            | 3 (5.4)   |
| HPV 61, n (%)                            | 1 (1.8)   |
| HPV 62, n (%)                            | 1 (1.8)   |
| HPV 62/81, n (%)                         | 5 (8.9)   |
| HPV 68, n (%)                            | 2 (3.6)   |
| HPV 72, n (%)                            | 1 (1.8)   |
| HPV 73, n (%)                            | 2 (3.6)   |
| HPV 82, n (%)                            | 1 (1.8)   |
| Simultaneous oral and genital HPV, n (%) | 3 (5.2)   |
| Cervical Cytology, n (%)                 |           |
| -Normal                                  | 55 (88.7) |

|                                  |         |
|----------------------------------|---------|
| -LSIL                            | 3 (1.0) |
| -ASCUS                           | 4 (1.3) |
| Gynecological examination, n (%) | 1 (1.7) |
| -CIN 1                           | 1 (100) |

IQR, interquartile range; PCR, polymerase chain reaction; HPV, human papillomavirus; LSIL, low-grade intraepithelial lesion; HSIL, high-grade intraepithelial lesion; ASCUS, atypical squamous cells of uncertain significance; CIN, cervical intraepithelial neoplasm.

Supplementary Table S2. Current HPV infection and the presence of anal dysplasia

|                                    | N=288       |
|------------------------------------|-------------|
| HPV+ PCR, n (%)                    | 238 (82.6)  |
| Identification of genotypes, n (%) | 281 (97.5%) |
| HPV-HR, n (%)                      | 189 (67.3)  |
| Number of HPV-HR, median (IQR)     | 1(0-2)      |
| HPV-LR, n (%)                      | 168 (59.8)  |
| Number of HPV-LR, median (IQR)     | 1 (0-2)     |
| HR- and LR-HPV coinfection, n (%)  | 123 (43.8)  |
| HPV 6                              | 33 (11.7)   |
| HPV 11                             | 16 (5.7)    |
| HPV 16                             | 42 (14.9)   |
| HPV 18                             | 21 (7.5)    |
| HPV 26                             | 1 (0.4)     |
| HPV 31                             | 36 (12.8)   |
| HPV 32                             | 1 (0.4)     |
| HPV 33                             | 22 (7.8)    |
| HPV 35                             | 26 (9.3)    |
| HPV 39                             | 29 (10.3)   |
| HPV 40                             | 12 (4.3)    |
| HPV 42                             | 28 (10.0)   |
| HPV 43                             | 16 (5.7)    |
| HPV 44                             | 1 (0.4)     |
| HPV 44/55                          | 54 (19.2)   |
| HPV 45                             | 22 (7.8)    |

|                                          |            |
|------------------------------------------|------------|
| HPV 51                                   | 23 (8.2)   |
| HPV 52                                   | 33 (11.7)  |
| HPV 53                                   | 12 (4.3)   |
| HPV 54                                   | 12 (4.3)   |
| HPV 56                                   | 24 (8.5)   |
| HPV 58                                   | 23 (8.2)   |
| HPV 59                                   | 33 (11.7)  |
| HPV 61                                   | 24 (8.5)   |
| HPV 62/81                                | 54 (19.2)  |
| HPV 66                                   | 18 (6.4)   |
| HPV 67                                   | 13 (4.6)   |
| HPV 68                                   | 41 (14.6)  |
| HPV 69                                   | 4 (1.4)    |
| HPV 70                                   | 27 (9.6)   |
| HPV 71                                   | 2 (0.7)    |
| HPV 72                                   | 24 (8.5)   |
| HPV 73                                   | 21 (7.5)   |
| HPV 82                                   | 12 (4.3)   |
| HPV 84                                   | 12 (4.3)   |
| Simultaneous oral and anal HPV infection | 25 (8.9)   |
|                                          | N =300     |
| <b>Anal Cytology, n (%)</b>              |            |
| -Normal                                  | 118 (39.6) |
| -LSIL                                    | 110 (36.9) |
| -HSIL                                    | 8 (2.7)    |
| -ASCUS                                   | 33 (11.1)  |
| -Not valid                               | 29 (9.7)   |
| <b>HRA, n (%)</b>                        | 89 (30.9)  |
| - LSIL (AIN 1)                           | 84 (29.2)  |
| -HSIL (AIN 2-3 or carcinoma in situ)     | 5 (1.7)    |

IQR, interquartile range; PCR, polymerase chain reaction; HPV, human papillomavirus; LSIL, low-grade squamous intraepithelial lesion; HSIL, high-grade squamous intraepithelial lesion; ASCUS, atypical squamous cells of uncertain significance; HRA: high resolution anoscopy; AIN, anal intraepithelial neoplasm.
